# Supplementary material for: Recovery Methods in Basketball: A Systematic Review
Source: MDPI journal article supplement (doi:10.3390/sports11110230), 2023-11-20
Supplement: s1 [file s1]

**Table S1.** Overview of research studies included in the systematic review.

| Study                      | Subjects                                         | Exercise protocol                                                                      | Measurement                                                                                              | Measurement timing                                               | Recovery methods                                                   | Findings                                                                                                                                     |
|----------------------------|--------------------------------------------------|----------------------------------------------------------------------------------------|----------------------------------------------------------------------------------------------------------|------------------------------------------------------------------|--------------------------------------------------------------------|----------------------------------------------------------------------------------------------------------------------------------------------|
| Ansdell & Dekerle (2020)   | 10 amateur male basketball players               | Basketball game simulation                                                             | MVIC (10 and 100 Hz), 15m sprint time, and layup completion                                              | Before and after each quarter of a simulated basketball game     | 0.2 g/kg of NaHCO <sub>3</sub><br>90 and 60 min pre-game           | ↑* MVIC were greater in the experimental group (10 and 100 Hz)<br>↔ between groups in 15m sprint times and layup completion (both decreased) |
| Atkins et al. (2020)       | 30 recreationally active male basketball players | 2x12 min of Basketball Exercise Simulation Test, 4x10 lunge jumps, and 2 min wall sits | Muscle soreness, CMJ, RST 6x20m, 505 agility test, and sleep quality                                     | Before and after the testing protocol and 15h following exercise | Lower body compression garments (15h after exercise - overnight)   | ↑* perceptual ratings of fatigue and muscle soreness<br>↔ or unclear effects for performance measures                                        |
| Ballmann et al. (2019)     | 12 male NCAA Division-III basketball players     | Wingate anaerobic test (2x30sec) with 5min recovery                                    | Mean and peak power, anaerobic and aerobic capacity, anaerobic power, total work, fatigue index, and RPE | Before and after the testing protocol                            | Lower body compression garments during activity                    | ↑* mean power output<br>↑* anaerobic capacity<br>↑* total work<br>↓* RPE<br>↔ peak power output<br>↔ anaerobic power<br>↔ fatigue index      |
| Chaiyakul & Chaibal (2021) | 11 university male basketball players            | HIIE (4x20m shuttle sprint and repetitive vertical jumps)                              | 20m shuttle sprint, VJ <sub>max</sub> HR, and RPE                                                        | Baseline and 24h after HIIE protocol                             | Cold water immersion (15°C) 1h and 3h after completion of exercise | ↑* VJ <sub>max</sub> (1h and 3h)<br>↓* muscle soreness (1h and 3h) vs. control                                                               |

| Study                          | Subjects                                                                               | Exercise protocol                                                                                  | Measurement                                                                 | Measurement timing                                                                                           | Recovery methods                                                                                                 | Findings                                                                                                                                                                                                                          |
|--------------------------------|----------------------------------------------------------------------------------------|----------------------------------------------------------------------------------------------------|-----------------------------------------------------------------------------|--------------------------------------------------------------------------------------------------------------|------------------------------------------------------------------------------------------------------------------|-----------------------------------------------------------------------------------------------------------------------------------------------------------------------------------------------------------------------------------|
| Cordova Martinez et al. (2017) | 12 professional male basketball players                                                | 2h gym workout in the morning and 3h basketball practice in the afternoon                          | CK, Mb, AST, ALT, LDH, urea, creatinine, TP, testosterone, cortisol, ACTH   | Baseline, Day 1 and, and Day 20                                                                              | 6g/day (20 days) of L-glutamine supplementation                                                                  | ↓* CK, ACTH<br>↓* Mb, AST                                                                                                                                                                                                         |
| Delextrat et al. (2013)        | 8 male and 8 female university basketball players                                      | Competitive match                                                                                  | CMJ, RSA, perception of fatigue                                             | 24h after competitive match                                                                                  | Massage<br>CWI                                                                                                   | ↓* Perception of fatigue (massage and CWI)<br>↑* CMJ (CWI)                                                                                                                                                                        |
| Delextrat et al. (2014)        | 9 male and 8 female university basketball players                                      | Competitive match                                                                                  | Perception of fatigue, leg soreness, CMJ, and RSA                           | Perception of fatigue and leg soreness immediately and 24h post-treatment and CMJ and RSA 24h post-treatment | Massage<br>MAS                                                                                                   | Men: ↑* CMJ for both treatments<br>Women: MAS ↑* RSA<br>Women > Men                                                                                                                                                               |
| Fernández-Lázaro et al. (2020) | 12 professional (treatment group) and 12 university basketball players (control group) | 2x/day training sessions for 5 days in a row with 1 day of rest, staggered with 6 friendly matches | RPE (Borg 10-scale), LEU, MON, LIN, RBC, Hb, Hct, Mb, CK, LDH, AST, and ALT | Baseline (T1), Week 4 (T2), and Week 8 (T3)                                                                  | After each training session and match players received compressive cryotherapy (2x15 min at 8°C with 5 min rest) | ↓* Hb in treatment group (T2 and T3 compared to T1)<br>↓* RPE in treatment group (T2 and T3 compared to T1)<br>↑* CK activity in the control group (T3 compared to T1)<br>↓* Mb in the treatment group (T3 and T2 compared to T1) |
| Ho et al. (2018)               | 15 collegiate male basketball players                                                  | 1h cycling at 70% VO <sub>2max</sub>                                                               | Cerebral oxygen saturation, glucose, insulin, and cycling time              | Baseline and after the exercise protocol completion                                                          | High-protein ingestion (6.25 kcal/kg; 6% fat, 36% protein, 58% carbohydrate)                                     | ↑* Cerebral oxygen saturation<br>↑* Peak insulin level<br>↓* Glucose level<br>↑* Longer cycling time                                                                                                                              |
| Hoffman et al. (2012)          | 10 female NCAA Division-I athletes                                                     | 4x40 min basketball game with 10-min half time                                                     | CMJ, 20s reaction time, player load, and basketball shooting assessment     | Pre-post game                                                                                                | L-alanyl-L-glutamine ingestion (AG1-1g/0.5L), (AG2-2g/0.5L), or water                                            | ↑* shooting performance (AG1 vs. non-hydrated)<br>↑* shooting performance (AG1 vs. water)<br>↑* player load (AG2 vs. non-hydrated)                                                                                                |

| Study                            | Subjects                                      | Exercise protocol                                                                 | Measurement                                                                                                                | Measurement timing                                                                  | Recovery methods                                                                         | Findings                                                                                                                                                                                                                              |
|----------------------------------|-----------------------------------------------|-----------------------------------------------------------------------------------|----------------------------------------------------------------------------------------------------------------------------|-------------------------------------------------------------------------------------|------------------------------------------------------------------------------------------|---------------------------------------------------------------------------------------------------------------------------------------------------------------------------------------------------------------------------------------|
| Howard & Hillman (2016)          | 8 female NCAA Division-III basketball players | Single NCAA half game regulation                                                  | CVJ, T-test, lay-ups made, jump shots made, 300-yard shuttle run, memory test, reaction time, plasma volume, blood lactate | Pre-post exercise protocol                                                          | Hydration interventions with carbohydrate-electrolyte solution (CES) vs. water (placebo) | ↓* plasma volume by 1.3±4.0% in CES vs. 3.2±5.0% in placebo<br>↑* memory test when consuming CES<br>↓* plasma volume change when consuming CES<br>↓* blood lactate with increase in CES ingestion                                     |
| Kaesaman & Eungpinichpong (2019) | 16 amateur male basketball players            | 20 min basketball simulated game                                                  | HRV and physical fitness (sit-and-reach test, grip strength, leg strength, and back strength)                              | Baseline, pre-recovery and post-recovery                                            | 10 min traditional Thai massage immediately post-exercise                                | ↑* HRV                                                                                                                                                                                                                                |
| Lin et al. (2017)                | 11 male NCAA Division-II basketball players   | 4x10 min quarters with 10 basketball drills and two 60 s rest in each quarter     | Basketball skill test, RPE, CK, LDH, T, C, T/C, lactate, glucose, and glycerol                                             | Before exercise, post-first half and post-second half on Day1 and Day2              | 0.17g/kg BCAA (2:1:1) and 0.04g/kg arginine                                              | ↓* total time to complete vertical jumps and ladder suicide sprint post-second half on Day2 in the intervention group<br>↓* post-exercise free tryptophan/BCAA in the intervention group<br>↔ shooting, dribbling, and passing skills |
| Lin et al. (2009)                | 30 university male basketball players         | Cycling until complete exhaustion (60 RPM at 120W, with 30W increase every 2 min) | HR, HR <sub>max</sub> , VO <sub>2max</sub> , and blood lactate                                                             | Rest, 5 min, 30 min, and 60 min post-exercise                                       | Acupuncture at the Neiguan (PC6) and Zusanli (ST36) acupoints                            | ↓* HR <sub>max</sub><br>↓* VO <sub>2max</sub><br>↓* blood lactate concentration                                                                                                                                                       |
| Mah et al. (2011)                | 11 male NCAA Division-I basketball players    | N/A                                                                               | Sprint time, shooting accuracy, POMS, ESS, PVT, and sleep-wake activity                                                    | After every practice on weekly bases, before and after the period of extended sleep | Extended sleep (>10h)                                                                    | ↑* sleep time<br>↑* faster sprint times<br>↑* free-throw and three-point percentage<br>↓* mean PVT reaction time and ESS scores<br>↑* POMS with increased vigor and decreased fatigue<br>↑ ratings of physical and mental well-being  |

| Study                     | Subjects                                | Exercise protocol                                                         | Measurement                                                                                                                                                                    | Measurement timing                                                                                     | Recovery methods                                                                                          | Findings                                                                                                                                                                                                   |
|---------------------------|-----------------------------------------|---------------------------------------------------------------------------|--------------------------------------------------------------------------------------------------------------------------------------------------------------------------------|--------------------------------------------------------------------------------------------------------|-----------------------------------------------------------------------------------------------------------|------------------------------------------------------------------------------------------------------------------------------------------------------------------------------------------------------------|
| Montgomery et al. (2008a) | 29 amateur male basketball players      | 3-day basketball tournament                                               | Fatty-acid binding protein (FABP), CK, Mb, IL-6, IL-10, and muscle soreness                                                                                                    | Baseline, 10min, 6h and 24h post-game                                                                  | CHO and stretching, CWI, and full-leg compression garments                                                | ↓ post-tournament rise in FABP and Mb<br>Moderate change in CK<br>↓ post-game muscle soreness after CWI                                                                                                    |
| Montgomery et al. (2008b) | 29 amateur male basketball players      | 3-day basketball tournament                                               | Physical performance tests (sprint, agility, CVJ, 20m acceleration and time, sit-and-reach), and muscle soreness                                                               | Before and after 3-day basketball tournament                                                           | CHO and stretching, CWI, and full-leg compression garments                                                | ↑* performance tests for CWI than CHO and stretching and full-leg compression garments<br>↓ CWI muscle soreness                                                                                            |
| Pelana et al. (2020)      | 26 university male basketball players   | High-intensity interval training                                          | Blood lactate and CVJ                                                                                                                                                          | Before and after the recovery session                                                                  | CWI 16°C for 7 min or slow jogging for 8 min                                                              | ↓* blood lactate post-recovery for CWI vs. slow jogging                                                                                                                                                    |
| Ronghui (2015)            | 10 university male basketball players   | Ergometer cycling with progression of the load every 5 min (20 min total) | Hb, RBC, HCT, and MCV                                                                                                                                                          | Before and after one month trial                                                                       | 20g whey protein and 40g oligosaccharides dissolved in 250ml milk                                         | ↑* Hb, RBC, HCT in intervention vs. control group                                                                                                                                                          |
| Schröder et al. (2000)    | 24 professional male basketball players | 32-day basketball competitive season                                      | Blood samples (LPO, TAS, Vitamin C, retinol, $\alpha$ -tocopherol, vitamin C, $\beta$ -carotene)                                                                               | Before and after supplementation                                                                       | 4x/day ingestion of 150mg $\alpha$ -tocopherol, 250mg ascorbic acid, and 8mg $\beta$ -carotene            | ↑* plasma $\alpha$ -tocopherol and $\beta$ -carotene in the experimental group<br>↓ plasma lipoperoxide, retinol, and vitamin C post-treatment with the antioxidants<br>↓ LPO/TAS ratio                    |
| Seco-Calvo et al. (2020)  | 28 professional basketball players      | Full basketball competitive season                                        | RPE, isokinetic peak torque, and muscle metabolism serum markers (lactate, Mb, CK, aldolase, glutamate oxalacetate transaminase, urea, creatinine, aspartate aminotransferase) | RPE and isokinetic peak torque (pre and post-season), blood samples (4x/season and 24h post last game) | CWI (10.5°C) - 5x2min intermittent whole-body immersions, separated by 2 min rest in ambient air (20.7°C) | ↓* RPE for CWI from the beginning to the end of the season<br>↑* isokinetic strength (CWI vs. control group)<br>↑ serum markers at each testing timepoint during the season were higher for CWI, except Mb |

| Study                | Subjects                                     | Exercise protocol                                                           | Measurement                                                                                                                                                      | Measurement timing                                                                                                                               | Recovery methods                                                                        | Findings                                                                                                                                |
|----------------------|----------------------------------------------|-----------------------------------------------------------------------------|------------------------------------------------------------------------------------------------------------------------------------------------------------------|--------------------------------------------------------------------------------------------------------------------------------------------------|-----------------------------------------------------------------------------------------|-----------------------------------------------------------------------------------------------------------------------------------------|
| Svilar et al. (2019) | 13 professional male basketball players      | 3-8 training sessions during the season and 2-3 games/week (10 games total) | External load metrics (player load, number of jumps, accelerations, and decelerations, changes of direction - total and high-intensity thresholds), RPE, and TQR | RPE 15-30-min following the training session, external load metrics during the training sessions, and TQR on game day and after morning practice | Short-term tapering (3 days pre-game)                                                   | ↑ TQR on a match day                                                                                                                    |
| Vidic et al. (2017)  | 13 female NCAA Division-I basketball players | Competitive basketball season (November-March)                              | Perception of Stress Scale-10, Athletic Skills Coping Inventory-28, Qualitative Reflections                                                                      | Pre-season, mid-season, and post-season                                                                                                          | 10-20 minutes of education regarding mindfulness and 15-20 minutes of guided meditation | ↓* perceived stress (pre to mid-test and mid to post-test)<br>↑* athletic coping skills (pre to mid and post-test and mid to post-test) |
| Watson et al. (2020) | 19 male NCAA Division-I basketball players   | 2 consecutive basketball seasons                                            | RPE, well-being variable (mood, fatigue, soreness, stress, sleep duration), and injury incidence                                                                 | Every day during the competitive season                                                                                                          | Sleep duration                                                                          | ↓* injury incidence with increased sleep duration (>8h of sleep)                                                                        |
| Zhao et al. (2012)   | 20 amateur female basketball players         | 14 days of identical training sessions                                      | Sleep quality, Cooper 12 min run (endurance), serum melatonin                                                                                                    | Before and after intervention protocol                                                                                                           | 30 min red-light therapy                                                                | ↑* sleep quality<br>↑* serum melatonin and endurance performance                                                                        |

↑ = increased; ↑\* = significantly increased; ↓ = decreased; ↓\* = significantly decreased; ↔ = no changes; AST = aspartate aminotransferase; ACTH = adrenocorticotrophic hormone; ALT = alanine transaminase; BCAA = branched chain amino acids; C = cortisol; CHO = carbohydrates; CK = creatine kinase; CMJ = countermovement vertical jump; CWI = cold-water immersion; ESS = Epworth Sleepiness Scale; Hb = hemoglobin; Hct = hematocrit; HIIE = high-intensity interval exercise; HR = heart rate; HR<sub>max</sub> = maximal heart rate; HRV = heart rate variability; IL-6 = interleukin-6; IL-10 = interleukin-10; LEU = leucocytes; LIN = lymphocytes; LDH = lactate-dehydrogenase; LPO = lipoperoxides; LPO/TAS = lipoperoxides; TO = total antioxidant status ratio; MAS = massage and stretching group; Mb = myoglobin; MON = monocytes; MVIC = maximal voluntary isometric contraction; NaHCO<sub>3</sub> = sodium-bicarbonate; NCAA = National Collegiate Athletic Association; POMS = profile of mood states; PVT = Psychomotor Vigilance Task; RBC = red blood cells; RPE = rating of perceived exertion; RST = repeated sprint test; RSA = repeated sprint ability; TAS = total antioxidant status; T = testosterone; T/C = testosterone-to-cortisol ratio; TQR = Total Quality of Recovery; VJ<sub>max</sub> = maximal vertical jump height; VO<sub>2max</sub> = maximal oxygen consumption.
